# Supplementary material for: The hepatic transcriptome of the turkey poult (Meleagris gallopavo) is minimally altered by high inorganic dietary selenium
Source: PLOS journal article supplement (doi:10.1371/journal.pone.0232160), 2020-05-07

S2 Figure 2

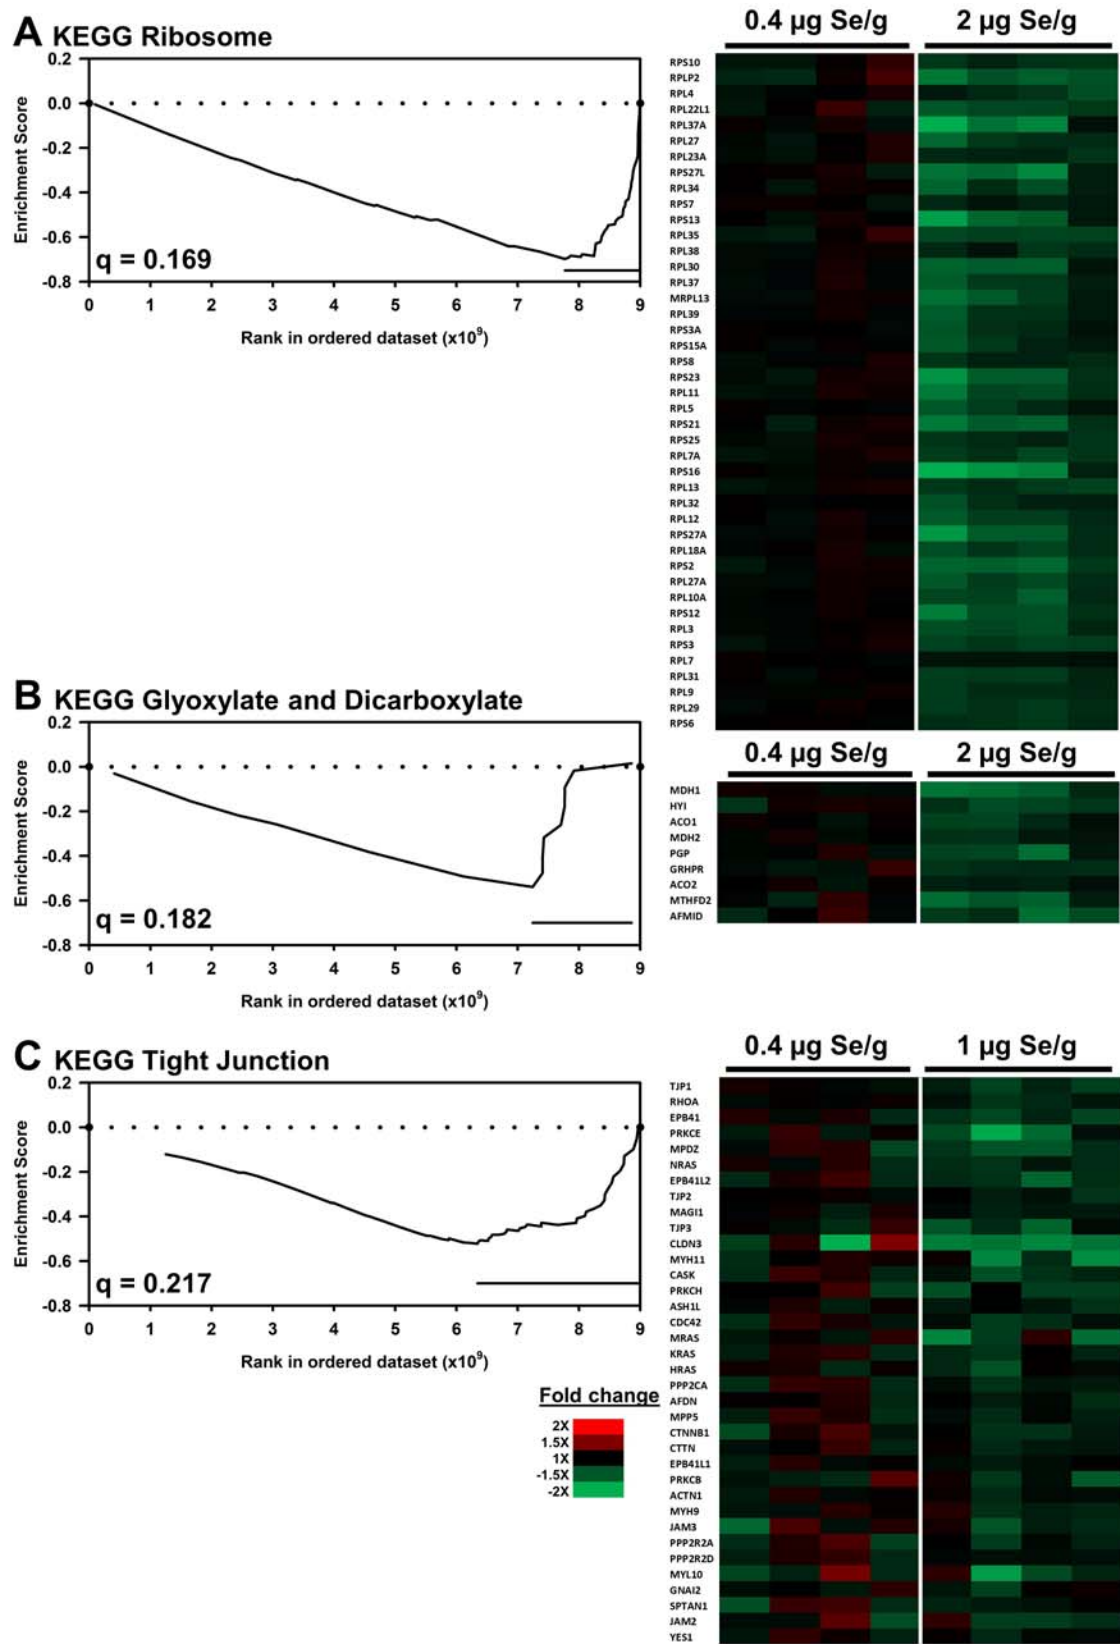

Supplement: S2 (10.1371/journal.pone.0232160.s002) [file journal.pone.0232160.s002]
