# Supplementary material for: The hepatic transcriptome of the turkey poult (Meleagris gallopavo) is minimally altered by high inorganic dietary selenium
Source: PLOS journal article supplement (doi:10.1371/journal.pone.0232160), 2020-05-07

S3 Figure 3

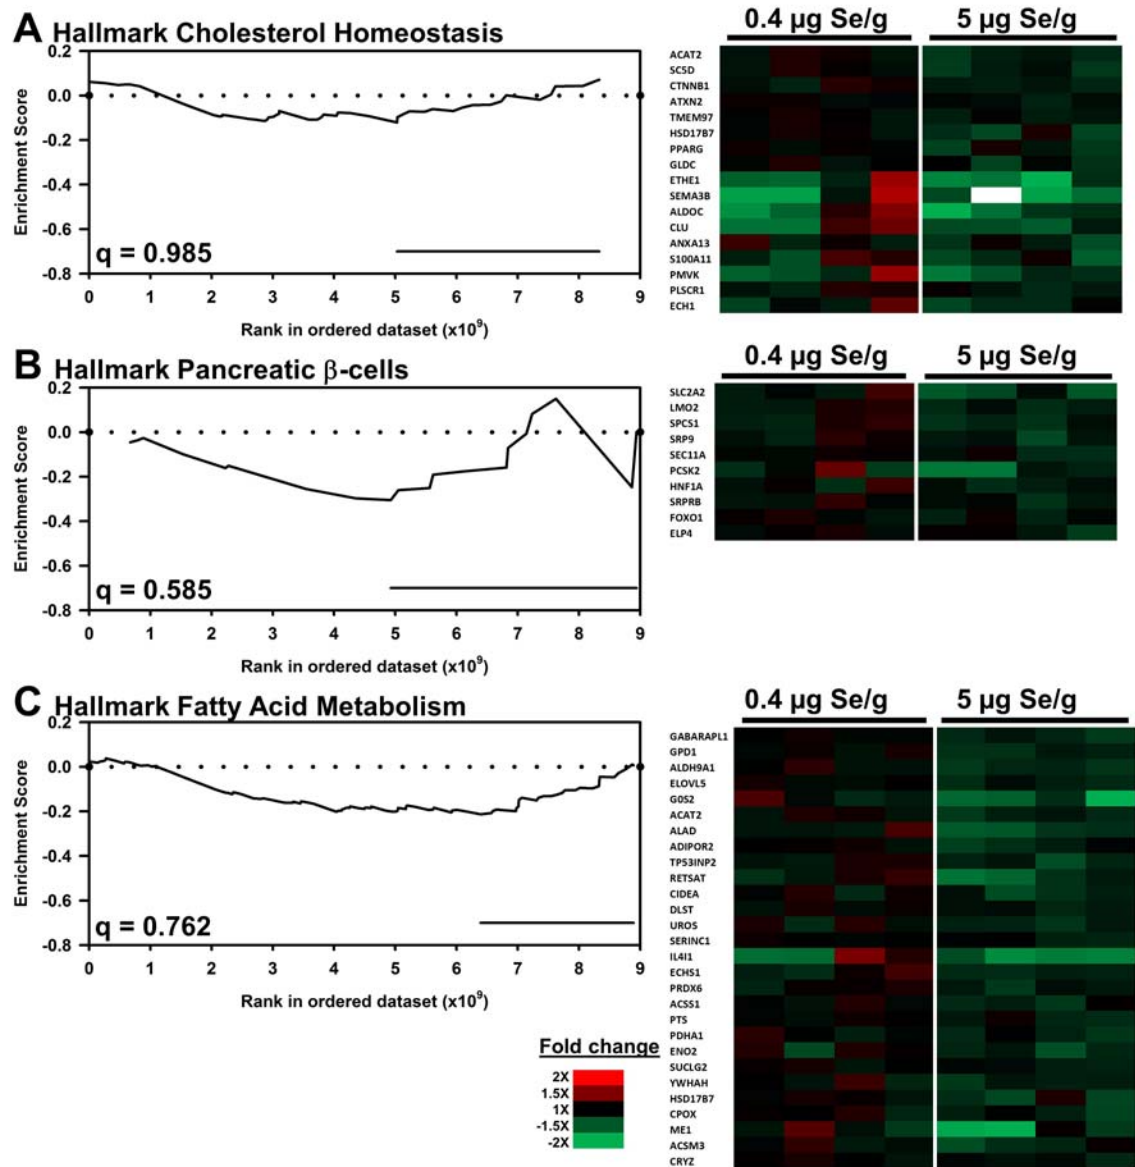

Supplement: S3 (10.1371/journal.pone.0232160.s003) [file journal.pone.0232160.s003]
